# Supplementary material for: An isolable β-diketiminato chlorosilylene
Source: Royal Society of Chemistry journal article supplement (doi:10.1039/c8dt00121a), 2018-01-01
Supplement: c8dt00121a1.pdf [file c8dt00121a1.pdf]

## *Electronic Supplementary Information*

### **An isolable $\beta$ -diketiminato chlorosilylene<sup>†</sup>**

Yun Xiong, Shenglai Yao, Arseni Kostenko, and Matthias Driess\*

Department of Chemistry, Technische Universität Berlin, Strasse des 17. Juni 135, Sekr. C2, D-10623 Berlin, Germany

E-mail: matthias.driess@tu-berlin.de

#### ***A Synthesis and Characterization***

|                                            |    |
|--------------------------------------------|----|
| <b>Synthesis and Characterization of 1</b> | S2 |
| <b>Synthesis and Characterization of 2</b> | S3 |
| <b>Synthesis and Characterization of 3</b> | S3 |
| <b>Synthesis and Characterization of 4</b> | S3 |
| <b>Synthesis and Characterization of 5</b> | S4 |

#### ***B Crystallographic data***

|                  |                                                                |     |
|------------------|----------------------------------------------------------------|-----|
| <b>Figure S1</b> | Molecular structure for <b>1</b>                               | S4  |
| <b>Table S1</b>  | Crystal data and structure refinement for <b>1</b>             | S5  |
| <b>Table S2</b>  | Selected interatomic distances [Å] and angles [°] for <b>1</b> | S5  |
| <b>Figure S2</b> | Molecular structure for <b>2</b>                               | S6  |
| <b>Table S3</b>  | Crystal data and structure refinement for <b>2</b>             | S7  |
| <b>Table S4</b>  | Selected interatomic distances [Å] and angles [°] for <b>2</b> | S7  |
| <b>Figure S3</b> | Molecular structure for <b>3</b>                               | S8  |
| <b>Table S5</b>  | Crystal data and structure refinement for <b>3</b>             | S9  |
| <b>Table S6</b>  | Selected interatomic distances [Å] and angles [°] for <b>3</b> | S9  |
| <b>Figure S4</b> | Molecular structure for <b>4</b>                               | S10 |
| <b>Table S7</b>  | Crystal data and structure refinement for <b>4</b>             | S11 |
| <b>Table S8</b>  | Selected interatomic distances [Å] and angles [°] for <b>4</b> | S11 |

#### ***C Theoretical Calculation***

#### ***D References***

## A *Synthesis and Characterization*

### *General Considerations*

All experiments were carried out under dry oxygen-free nitrogen using standard Schlenk techniques. Solvents were dried by standard methods and freshly distilled prior to use. The NMR spectra were recorded with Bruker spectrometers ARX200 and AV400 referenced to residual solvent signals as internal standards. Abbreviations: *s* = singlet; *d* = doublet; *t* = triplet; *sept* = septet; *m* = multiplet; Elemental analyses and ESI-MS were performed by the analytical labor in the Institute of Chemistry, Technical University of Berlin, Germany. IR spectra were measured from powder samples inside a nitrogen filled glovebox using a Thermofisher Nicolet iS5 IR Spectrometer (ATR-Diamond) and the OMNIC software (Version 9.3.30) for data acquisition. The ligand **LH** was synthesized according to literature.<sup>1</sup>

### *Single-Crystal X-ray Structure Determination*

Crystals were each mounted on a glass capillary in per-fluorinated oil and measured in a cold N<sub>2</sub> flow. The data of **1**, **2**, **3** and **4** were collected on an Oxford Diffraction Supernova, Single source at offset, Atlas at 150 K (Cu- K $\alpha$ -radiation,  $\lambda = 1.5418 \text{ \AA}$ ). The structures were solved by direct method and refined on  $F^2$  with the SHELX-97<sup>2</sup> software package. The positions of the H atoms were calculated and considered isotropically according to a riding model. CCDC 1588134 (compound **1**), 1588135 (compound **2**), 1588133 (compound **3**), and 1588136 (compound **4**) contain the supplementary crystallographic data for this paper. In the structure of compound **2**, the chlorine atom is disordered over two orientations with refined site occupancies of 0.94 and 0.06. In the structure of compound **4**, the whole molecule is disordered over two orientations with refined site occupancies of 0.82 and 0.18. It is noteworthy that a twin phenomenon cannot be excluded although the refinement model with disorder treatment is satisfied. These data can be obtained free of charge via [www.ccdc.cam.ac.uk/data\\_request/cif](http://www.ccdc.cam.ac.uk/data_request/cif), or by contacting The Cambridge Crystallographic Data Centre, 12, Union Road, Cambridge CB2 1EZ, UK; fax: +44 1223 336033.

### *Synthesis and Characterization of 1*

At -20 °C <sup>n</sup>BuLi (13.92 mL, 2.5M in n-hexane) was dropwise added to a suspension of **LH** (13.60 g, 34.81mmol) in toluene (150 mL). The reaction mixture was raised to room temperature and stirred for 2h. To the solution HSiCl<sub>3</sub> (3.51 mL) was dropwise added at -20 °C. The reaction mixture was warmed to ambient temperature and was stirred for 3 days. The precipitate was separated away from the solution. Storage of the concentrated solution at -20 °C in a freezer for 1 day afforded 6.20 g (12.66 mmol, 36.4%) of **1** as pure colorless powder. M. p. 171 °C (decomp.); <sup>1</sup>H NMR (200.13 MHz, [D<sub>8</sub>] THF, 25°C):  $\delta = 1.05$  (*d*, <sup>3</sup>*J*(H,H) = 6.9 Hz, 12 H; -CH(CH<sub>3</sub>)<sub>3</sub>), 1.25 (*d*, <sup>3</sup>*J*(H,H) = 6.9 Hz, 12 H; -CH(CH<sub>3</sub>)<sub>3</sub>), 3.21 (*sept*, <sup>3</sup>*J*(H,H) = 6.9 Hz, 4 H; -CH(CH<sub>3</sub>)<sub>3</sub>), 5.58 (*t*, <sup>3</sup>*J*(H,H) = 6.46 Hz, 1 H;  $\gamma$ -CH), 6.46 (*t*, <sup>4</sup>*J*(H,H) = 1.9 Hz 1 H; SiH), 7.09 – 7.22 (*m*, 6 H; *Ph*), 7.53 (*dd*, <sup>3</sup>*J*(H,H) = 6.46 Hz, <sup>4</sup>*J*(H,H) = 1.9 Hz, 2 H;  $\beta$ -CH); <sup>13</sup>C{<sup>1</sup>H} NMR (100.61 MHz, [D<sub>8</sub>] THF, 25 °C):  $\delta = 23.89$ , 25.60 (CH(CH<sub>3</sub>)<sub>3</sub>), 30.00 (CH(CH<sub>3</sub>)<sub>3</sub>), 97.72 ( $\gamma$ -C), 125.11 (*m-Ph*), 128.75 (*p-Ph*), 144.95 (*o-Ph*), 145.60 (*N-Ph*), 162.97 ppm ( $\beta$ -C); <sup>29</sup>Si{<sup>1</sup>H} NMR (79.49 MHz, [D<sub>8</sub>]THF, 25°C):  $\delta = -97.39$  ppm (*s*); IR (cm<sup>-1</sup>): 2960(*s*), 2927(*w*), 2867(*w*), 2148(*w*,  $\nu_{\text{SiH}}$ ), 1608(*s*), 1536(*vs*), 1458(*s*), 1444(*s*), 1384(*w*), 1363(*w*), 1345(*s*), 1297(*vs*), 1259(*w*), 1194(*w*), 1182(*m*), 1145(*m*), 1102(*w*), 1077(*m*), 1059(*m*), 1002(*m*), 911(*w*), 807(*w*), 788(*s*), 758(*vs*), 714(*m*), 672(*vs*), 632(*w*), 603(*m*), 564(*w*); HR ESI-MS: *m/z*: 391.31063 (calc. 391.31078 [M-SiCl<sub>2</sub>]<sup>+</sup>); elemental analysis calcd. (%) for C<sub>27</sub>H<sub>38</sub>N<sub>2</sub>SiCl<sub>2</sub>: C 66.24, H 7.82, N 5.72, S 10.35; found: C 65.98, H 7.69, N 5.83. %).

### Synthesis and Characterization of 2

To a mixture of **1** (0.99 g, 2.02 mmol) and Et<sub>2</sub>O-LiN(SiMe<sub>3</sub>)<sub>2</sub> (0.49 g, 2.02 mmol) at -70 °C was added toluene (50 mL) under stirring. The mixture was allowed to warm to room temperature and stirred overnight. The precipitate was separated away via centrifugation, and the volatiles were removed under vacuum. From the residue compound **2** was obtained by extraction with diethyl ether. The collected colorless crystals of **2** are amounted to 0.80 g (1.30 mmol, 64%). M.p. 128 °C; <sup>1</sup>H NMR (200.13 MHz, [D<sub>6</sub>] C<sub>6</sub>H<sub>6</sub>, 25°C): δ = -0.20 (s, 9 H; SiMe<sub>3</sub>), 0.47 (s, 9 H; SiMe<sub>3</sub>), 1.21 (d, <sup>3</sup>J(H,H) = 6.8 Hz, 3 H; -CH(CH<sub>3</sub>)<sub>3</sub>), 1.23 (d, <sup>3</sup>J(H,H) = 6.8 Hz, 3 H; -CH(CH<sub>3</sub>)<sub>3</sub>), 1.26 (d, <sup>3</sup>J(H,H) = 6.8 Hz, 3 H; -CH(CH<sub>3</sub>)<sub>3</sub>), 1.27 (d, <sup>3</sup>J(H,H) = 6.8 Hz, 3 H; -CH(CH<sub>3</sub>)<sub>3</sub>), 1.31 (d, <sup>3</sup>J(H,H) = 6.8 Hz, 3 H; -CH(CH<sub>3</sub>)<sub>3</sub>), 1.37 (d, <sup>3</sup>J(H,H) = 6.8 Hz, 3 H; -CH(CH<sub>3</sub>)<sub>3</sub>), 1.41 (d, <sup>3</sup>J(H,H) = 6.8 Hz, 3 H; -CH(CH<sub>3</sub>)<sub>3</sub>), 1.46 (d, <sup>3</sup>J(H,H) = 6.8 Hz, 3 H; -CH(CH<sub>3</sub>)<sub>3</sub>), 3.51 (sept, <sup>3</sup>J(H,H) = 6.8 Hz, 1 H; -CH(CH<sub>3</sub>)<sub>3</sub>), 3.62 (sept, <sup>3</sup>J(H,H) = 6.8 Hz, 1 H; -CH(CH<sub>3</sub>)<sub>3</sub>), 3.84 (sept, <sup>3</sup>J(H,H) = 6.8 Hz, 1 H; -CH(CH<sub>3</sub>)<sub>3</sub>), 3.88 (sept, <sup>3</sup>J(H,H) = 6.8 Hz, 1 H; -CH(CH<sub>3</sub>)<sub>3</sub>), 4.43 (dd, <sup>3</sup>J(H,H) = 3.8, 8.9 Hz, 1 H; Y-CH), 5.04 (dd, <sup>3</sup>J(H,H) = 1.9, 3.8 Hz, 1 H; (SiMe<sub>3</sub>)<sub>2</sub>N-CH), 5.80 (dddd, <sup>3</sup>J(H,H) = 1.9, 8.9 Hz, <sup>4</sup>J(H,H) = 0.7 Hz, 1 H; β-CH), 6.15 (t, <sup>4</sup>J(H,H) = 0.7 Hz, <sup>1</sup>J(Si-H) = 133 Hz, 1 H; SiH), 7.03 – 7.20 (m, 6 H; Ph); <sup>13</sup>C{<sup>1</sup>H} NMR (100.61 MHz, [D<sub>6</sub>] C<sub>6</sub>H<sub>6</sub>, 25 °C): δ = 1.56, 4.56 (N(SiMe<sub>3</sub>)<sub>2</sub>), 23.48, 23.72, 24.03, 24.61, 25.22, 25.57, 26.02, 26.33 (CH(CH<sub>3</sub>)<sub>3</sub>), 27.86, 28.14, 28.40, 28.43 (CH(CH<sub>3</sub>)<sub>3</sub>), 75.02 ((SiMe<sub>3</sub>)<sub>2</sub>NCH), 103.16 (Y-C), 123.73, 123.96, 124.92, 125.33, 127.37, 127.96 (CH in Ph), 136.14 (β- =CH), 138.23, 139.85, 147.05, 148.27, 148.55, 148.55 ppm (Ph); <sup>29</sup>Si{<sup>1</sup>H} NMR (79.49 MHz, [D<sub>6</sub>] C<sub>6</sub>H<sub>6</sub>, 25°C): δ = -0.19 (s, N(SiMe<sub>3</sub>)<sub>2</sub>), -2.94 (s, N(SiMe<sub>3</sub>)<sub>2</sub>), -38.2 ppm (s, SiH); HR ESI-MS: *m/z*: 614.35433 (calc. 614.35383 [M+H]<sup>+</sup>). IR (KBr, cm<sup>-1</sup>): 2961(s), 2868(m), 2194(s, ν<sub>SiH</sub>), 1644(s), 1464(s), 1442(s), 1311(s), 1275(s), 1252(vs), 1188(s), 1159(vs), 1104(w), 1055(w), 1043(w), 1014(w), 988(vs), 953(m), 928(s), 902(s), 867(vs), 835(vs), 808(m), 798(vs), 759(s), 734(m); elemental analysis calcd. (%) for C<sub>33</sub>H<sub>56</sub>N<sub>3</sub>Si<sub>3</sub>Cl: C 64.50, H 9.18, N 6.84; found: C 64.26, H 9.33, N 6.87.

### Synthesis and Characterization of 3

To a mixture of **1** (0.64 g, 1.30 mmol) and K<sub>2</sub>Fe(CO)<sub>4</sub> (0.32 g, 1.30 mmol) at -30 °C was added THF (20 mL) under stirring. The mixture was allowed to warm to room temperature and stirred overnight. A dark brown precipitate was formed. The volatiles were removed under vacuum. From the residue compound **3** was obtained by extraction with diethyl ether (30 mL) as colorless crystals (0.38 g, 0.42 mmol, 65%). M.p. 103 °C (decomposed); <sup>1</sup>H NMR (200.13 MHz, [D<sub>6</sub>] C<sub>6</sub>H<sub>6</sub>, 25°C): δ = 0.45 (d, <sup>3</sup>J(H,H) = 6.9 Hz, 3 H; -CH(CH<sub>3</sub>)<sub>3</sub>), 1.15 (d, <sup>3</sup>J(H,H) = 6.9 Hz, 3 H; -CH(CH<sub>3</sub>)<sub>3</sub>), 1.23 (d, <sup>3</sup>J(H,H) = 6.9 Hz, 9 H; -CH(CH<sub>3</sub>)<sub>3</sub>), 1.27 (d, <sup>3</sup>J(H,H) = 6.9 Hz, 3 H; -CH(CH<sub>3</sub>)<sub>3</sub>), 1.29 (d, <sup>3</sup>J(H,H) = 6.9 Hz, 3 H; -CH(CH<sub>3</sub>)<sub>3</sub>), 1.40 (d, <sup>3</sup>J(H,H) = 6.9 Hz, 3 H; -CH(CH<sub>3</sub>)<sub>3</sub>), 3.29 – 3.44 (m, 1 H; -CH(CH<sub>3</sub>)<sub>3</sub>), 3.65 – 3.89 (m, 3 H; -CH(CH<sub>3</sub>)<sub>3</sub>), 4.23 (d, <sup>3</sup>J(H,H) = 2.5 Hz, 1 H; β-CH), 5.32 (dd, <sup>3</sup>J(H,H) = 8.9, 2.5 Hz, 1 H; (Y-CH), 5.74 (s, 1 H; SiH), 6.33 (d, <sup>3</sup>J(H,H) = 8.9 Hz, 1 H; β-(=CH)), 6.91 – 7.12 (m, 6 H; Ph); <sup>13</sup>C{<sup>1</sup>H} NMR (100.61 MHz, [D<sub>6</sub>] C<sub>6</sub>H<sub>6</sub>, 25 °C): δ = 23.48, 23.89, 24.69, 24.75, 25.38, 25.55, 25.65 (CH(CH<sub>3</sub>)<sub>3</sub>), 28.12, 28.20, 28.43 (CH(CH<sub>3</sub>)<sub>3</sub>), 63.66 (β-C), 99.00 (Y-C), 124.01, 124.78, 124.82, 125.78, 127.95, 128.00 (CH in Ph), 136.30 (β- (=CH)), 136.43, 137.22, 147.42, 147.44, 148.59, 149.33 ppm (Ph); <sup>29</sup>Si{<sup>1</sup>H} NMR (79.49 MHz, [D<sub>6</sub>] C<sub>6</sub>H<sub>6</sub>, 25°C): δ = -38.29 (s); HR ESI-MS: *m/z*: 907.50753 (calc. 907.50583 [M+H]<sup>+</sup>). IR (cm<sup>-1</sup>): 2963(s), 2926(w), 2867(w), 2238(s, ν<sub>SiH</sub>), 1977(s), 1934(s), 1646(s), 1450(s), 1383(s), 1363(s), 1330(w), 1252(s), 1209(w), 1183(w), 1155(vs), 1107(m), 1045(m), 963(m), 923(w), 902(w), 868(vs), 830(w), 801(vs), 786(s), 756(s), 750(s), 708(w), 662(w), 592(w), 566(w); elemental analysis calcd. (%) for C<sub>54</sub>H<sub>76</sub>N<sub>4</sub>Si<sub>2</sub>Cl<sub>2</sub>: C 71.41, H 8.43, N 6.17; found: C 70.99, H 8.33, N 6.27.

### Synthesis and Characterization of 4

At -40 °C THF (20 mL) was added to a mixture of **1** (1.52 g, 3.10 mmol) and 1,3-di(tert-butyl)-imidazol-2-ylidene (0.56 g, 3.10 mmol) under stirring. The solution was allowed to warm to room temperature, and the color changed slowly from colorless, via yellow, to orange-red with the formation of small amount of white precipitate. After overnight stirring the precipitate was separated from the solution via filtration and the volatiles were evacuated

under reduced pressure. The residue was extracted with diethyl ether (20 mL), from which compound **4** as orange-red colored crystals was obtained at room temperature with a yield of 0.14 g (0.31 mmol, 10%). M. p. 188 °C (decomp.);  $^1\text{H}$  NMR (200.13 MHz,  $[\text{D}_6]$   $\text{C}_6\text{H}_6$ , 25°C):  $\delta$  = 1.06 (*d*,  $^3J(\text{H,H})$  = 6.70 Hz, 6 H;  $-\text{CH}(\text{CH}_3)_3$ ), 1.16 (*d*,  $^3J(\text{H,H})$  = 6.70 Hz, 6 H;  $-\text{CH}(\text{CH}_3)_3$ ), 1.35 (*d*,  $^3J(\text{H,H})$  = 6.70 Hz, 6 H;  $-\text{CH}(\text{CH}_3)_3$ ), 1.38 (*d*,  $^3J(\text{H,H})$  = 6.70 Hz, 6 H;  $-\text{CH}(\text{CH}_3)_3$ ), 3.60 (*sept*,  $^3J(\text{H,H})$  = 6.70 Hz, 2 H;  $-\text{CH}(\text{CH}_3)_3$ ), 3.81 (*sept*,  $^3J(\text{H,H})$  = 6.70 Hz, 2 H;  $-\text{CH}(\text{CH}_3)_3$ ), 5.07 (*t*,  $^3J(\text{H,H})$  = 6.50 Hz, 1 H;  $\Upsilon$ -CH), 7.05 (*d*,  $^3J(\text{H,H})$  = 6.50 Hz, 2 H;  $\beta$ -CH), 7.10 – 7.19 ppm (*m*, 6 H; *Ph*);  $^{13}\text{C}\{^1\text{H}\}$  NMR (100.61 MHz,  $[\text{D}_6]$   $\text{C}_6\text{H}_6$ , 25 °C):  $\delta$  = 22.62, 24.75, 24.86, 25.27 ( $\text{CH}(\text{CH}_3)_3$ ), 27.94, 29.55 ( $\text{CH}(\text{CH}_3)_3$ ), 95.84 ( $\Upsilon$ -CH), 123.53, 125.28, 128.18 (CH in *Ph*), 141.87, 143.40, 145.70 (*N-Ph*, *o-Ph*), 157.46 ppm ( $\beta$ -C);  $^{29}\text{Si}\{^1\text{H}\}$  NMR (79.49 MHz,  $[\text{D}_6]$   $\text{C}_6\text{H}_6$ , 25°C):  $\delta$  = -10.73 ppm (*s*); HR ESI-MS: *m/z*: 453.24873 (calc. 453.24674  $[\text{M}+\text{H}]^+$ ); IR (KBr,  $\text{cm}^{-1}$ ): 2955(*m*), 2866(*w*), 1586(*m*), 1514(*m*), 1463(*m*), 1430(*m*), 1344(*m*), 1323(*w*), 1307(*w*), 1271(*s*), 1231(*vs*), 1206(*s*), 1151(*vs*), 1059(*m*), 963(*s*), 805(*m*), 782(*m*), 764(*m*), 754(*s*), 641(*m*); elemental analysis calcd. (%) for  $\text{C}_{27}\text{H}_{37}\text{N}_2\text{SiCl}$ : C 71.57, H 8.23, N 6.18; found: C 71.29, H 8.13, N 6.22.

### Synthesis and Characterization of **5**

At room temperature toluene (10 mL) was added to a mixture of **4** (0.18 g, 0.40 mmol) and  $\text{S}_8$  (0.013 g, 0.050 mmol) under stirring. The reaction mixture turned yellow immediately. One hour later the volatiles were evacuated under reduced pressure and the residue was washed with n-hexane (5 mL). It afforded compound **5** as off-white powder with yield of 0.17 g (0.35 mmol, 88%). M. p. 220 °C (decomp.);  $^1\text{H}$  NMR (200.13 MHz,  $[\text{D}_6]$   $\text{C}_6\text{H}_6$ , 25°C):  $\delta$  = 1.02 (*d*,  $^3J(\text{H,H})$  = 6.70 Hz, 6 H;  $-\text{CH}(\text{CH}_3)_3$ ), 1.09 (*d*,  $^3J(\text{H,H})$  = 6.70 Hz, 6 H;  $-\text{CH}(\text{CH}_3)_3$ ), 1.36 (*d*,  $^3J(\text{H,H})$  = 6.70 Hz, 6 H;  $-\text{CH}(\text{CH}_3)_3$ ), 1.55 (*d*,  $^3J(\text{H,H})$  = 6.70 Hz, 6 H;  $-\text{CH}(\text{CH}_3)_3$ ), 3.58 (*sept*,  $^3J(\text{H,H})$  = 6.70 Hz, 2 H;  $-\text{CH}(\text{CH}_3)_3$ ), 3.76 (*sept*,  $^3J(\text{H,H})$  = 6.70 Hz, 2 H;  $-\text{CH}(\text{CH}_3)_3$ ), 4.74 (*t*,  $^3J(\text{H,H})$  = 6.52 Hz, 1 H;  $\Upsilon$ -CH), 6.92 (*d*,  $^3J(\text{H,H})$  = 6.52 Hz, 2 H;  $\beta$ -CH), 7.04 – 7.12 ppm (*m*, 6 H; *Ph*);  $^{13}\text{C}\{^1\text{H}\}$  NMR (100.61 MHz,  $[\text{D}_6]$   $\text{C}_6\text{H}_6$ , 25 °C):  $\delta$  = 22.76, 24.65, 24.87, 25.36 ( $\text{CH}(\text{CH}_3)_3$ ), 28.47, 29.67 ( $\text{CH}(\text{CH}_3)_3$ ), 96.38 ( $\Upsilon$ -CH), 124.24, 124.90, 129.11 (CH in *Ph*), 139.43, 144.93, 145.47 (*N-Ph*, *o-Ph*), 162.66 ppm ( $\beta$ -C);  $^{29}\text{Si}\{^1\text{H}\}$  NMR (79.49 MHz,  $[\text{D}_6]$   $\text{C}_6\text{H}_6$ , 25°C):  $\delta$  = -28.63 ppm (*s*); HR ESI-MS: *m/z*: 391.31103 (calc. 391.31078  $[\text{M}-\text{SiSiCl}+\text{H}]^+$ ); IR (KBr,  $\text{cm}^{-1}$ ): 2961(*w*), 2866(*w*), 2788(*w*), 2728(*m*), 1599(*s*), 1566(*vs*), 1521(*vs*), 1463(*m*), 1334(*m*), 1309(*vs*), 1244(*m*), 1210(*s*), 1160(*w*), 1144(*w*), 1095(*w*), 1059(*w*), 935(*w*), 816(*m*), 798(*s*), 763(*s*), 701(*w*), 680(*w*); elemental analysis calcd. (%) for  $\text{C}_{27}\text{H}_{37}\text{N}_2\text{SiSiCl}$ : C 66.84, H 7.69, N 5.77, S 6.61; found: C 66.29, H 7.53, N 5.82, S 6.46.

### B. Crystallographic data

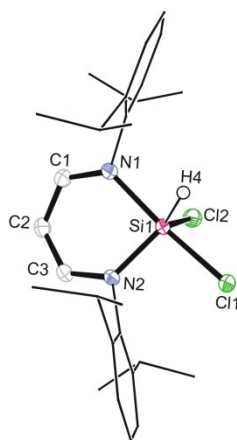

**Figure S 1.** Molecular structure of compound **1**. Thermal ellipsoids are drawn at 50% probability level. H atoms (except that in Si1) are omitted for clarity.

**Table S1.** Crystal data and structure refinement for **1**.

|                                   |                                                                                                  |
|-----------------------------------|--------------------------------------------------------------------------------------------------|
| Empirical formula                 | C <sub>27</sub> H <sub>38</sub> Cl <sub>2</sub> N <sub>2</sub> Si                                |
| Formula weight                    | 489.58                                                                                           |
| Temperature                       | 150(2) K                                                                                         |
| Wavelength                        | 1.54184 Å                                                                                        |
| Crystal system                    | Monoclinic                                                                                       |
| Space group                       | P21/c                                                                                            |
| Unit cell dimensions              | a = 16.9139(4) Å a = 90°.<br>b = 6.73970(10) Å      b = 95.840(2)°.<br>c = 24.2997(6) Å g = 90°. |
| Volume                            | 2755.66(10) Å <sup>3</sup>                                                                       |
| Z                                 | 4                                                                                                |
| Density (calculated)              | 1.180 Mg/m <sup>3</sup>                                                                          |
| Absorption coefficient            | 2.649 mm <sup>-1</sup>                                                                           |
| F(000)                            | 1048                                                                                             |
| Crystal size                      | 0.45 x 0.05 x 0.04 mm <sup>3</sup>                                                               |
| Theta range for data collection   | 2.63 to 67.49°.                                                                                  |
| Index ranges                      | -19 ≤ h ≤ 20, -7 ≤ k ≤ 8, -29 ≤ l ≤ 20                                                           |
| Reflections collected             | 9614                                                                                             |
| Independent reflections           | 4943 [R(int) = 0.0354]                                                                           |
| Completeness to theta = 67.49°    | 99.9 %                                                                                           |
| Absorption correction             | Semi-empirical from equivalents                                                                  |
| Max. and min. transmission        | 1.00000 and 0.32561                                                                              |
| Refinement method                 | Full-matrix least-squares on F <sup>2</sup>                                                      |
| Data / restraints / parameters    | 4943 / 0 / 301                                                                                   |
| Goodness-of-fit on F <sup>2</sup> | 1.042                                                                                            |
| Final R indices [I > 2σ(I)]       | R1 = 0.0389, wR2 = 0.0954                                                                        |
| R indices (all data)              | R1 = 0.0495, wR2 = 0.1044                                                                        |
| Largest diff. peak and hole       | 0.315 and -0.282 e.Å <sup>-3</sup>                                                               |

**Table S2.** Selected interatomic distances [Å] and angles [°] for compound **1**.

|             |            |
|-------------|------------|
| Cl(1)-Si(1) | 2.1916(7)  |
| Si(1)-N(2)  | 1.7985(16) |
| Si(1)-N(1)  | 1.9565(16) |
| Si(1)-Cl(2) | 2.0909(7)  |
| N(1)-C(1)   | 1.314(3)   |

|                   |            |
|-------------------|------------|
| N(2)-C(3)         | 1.354(2)   |
| C(3)-C(2)         | 1.370(3)   |
| C(1)-C(2)         | 1.382(3)   |
|                   |            |
| N(2)-Si(1)-N(1)   | 90.94(7)   |
| N(2)-Si(1)-Cl(2)  | 110.49(6)  |
| N(1)-Si(1)-Cl(2)  | 91.85(5)   |
| N(2)-Si(1)-Cl(1)  | 93.37(5)   |
| N(1)-Si(1)-Cl(1)  | 170.93(6)  |
| Cl(2)-Si(1)-Cl(1) | 94.10(3)   |
| C(1)-N(1)-Si(1)   | 126.42(13) |
| C(3)-N(2)-Si(1)   | 124.68(13) |
| N(2)-C(3)-C(2)    | 127.30(18) |
| N(1)-C(1)-C(2)    | 122.51(18) |
| C(3)-C(2)-C(1)    | 121.51(19) |

---

Symmetry transformations used to generate equivalent atoms:

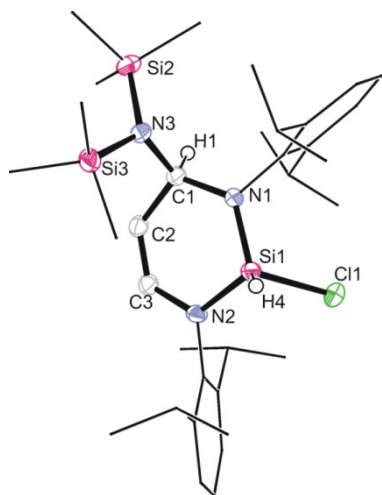

**Figure S2.** Molecular structure of compound **2**. The chlorine atom is disordered over two orientations with refined site occupancies of 0.94 and 0.06, only the major one is depicted. Thermal ellipsoids are drawn at 50% probability level. H atoms (except those in C1 and Si1) are omitted for clarity.

**Table S3.** Crystal data and structure refinement for **2**.

|                                   |                                                                   |          |
|-----------------------------------|-------------------------------------------------------------------|----------|
| Empirical formula                 | C <sub>33</sub> H <sub>56</sub> Cl N <sub>3</sub> Si <sub>3</sub> |          |
| Formula weight                    | 614.53                                                            |          |
| Temperature                       | 150(2) K                                                          |          |
| Wavelength                        | 1.54184 Å                                                         |          |
| Crystal system                    | Orthorhombic                                                      |          |
| Space group                       | Pca21                                                             |          |
| Unit cell dimensions              | a = 11.2116(2) Å                                                  | α = 90°. |
|                                   | b = 17.7148(3) Å                                                  | β = 90°. |
|                                   | c = 18.6404(3) Å                                                  | γ = 90°. |
| Volume                            | 3702.19(11) Å <sup>3</sup>                                        |          |
| Z                                 | 4                                                                 |          |
| Density (calculated)              | 1.103 Mg/m <sup>3</sup>                                           |          |
| Absorption coefficient            | 2.017 mm <sup>-1</sup>                                            |          |
| F(000)                            | 1336                                                              |          |
| Crystal size                      | 0.45 x 0.23 x 0.19 mm <sup>3</sup>                                |          |
| Theta range for data collection   | 2.49 to 67.50°.                                                   |          |
| Index ranges                      | -13 ≤ h ≤ 9, -21 ≤ k ≤ 20, -22 ≤ l ≤ 22                           |          |
| Reflections collected             | 24032                                                             |          |
| Independent reflections           | 6353 [R(int) = 0.0266]                                            |          |
| Completeness to theta = 67.50°    | 99.9 %                                                            |          |
| Absorption correction             | Semi-empirical from equivalents                                   |          |
| Max. and min. transmission        | 1.00000 and 0.05117                                               |          |
| Refinement method                 | Full-matrix least-squares on F <sup>2</sup>                       |          |
| Data / restraints / parameters    | 6353 / 1 / 384                                                    |          |
| Goodness-of-fit on F <sup>2</sup> | 1.038                                                             |          |
| Final R indices [I > 2σ(I)]       | R1 = 0.0285, wR2 = 0.0750                                         |          |
| R indices (all data)              | R1 = 0.0291, wR2 = 0.0758                                         |          |
| Absolute structure parameter      | -0.023(10)                                                        |          |
| Largest diff. peak and hole       | 0.244 and -0.174 e.Å <sup>-3</sup>                                |          |

**Table S4.** Selected interatomic distances [Å] and angles [°] for compound **2**.

|             |            |
|-------------|------------|
| Cl(1)-Si(1) | 2.0496(6)  |
| Si(1)-N(1)  | 1.7014(13) |
| Si(1)-N(2)  | 1.7185(14) |
| N(1)-C(1)   | 1.4812(19) |
| C(1)-N(3)   | 1.4939(19) |

|            |            |
|------------|------------|
| C(1)-C(2)  | 1.503(2)   |
| Si(2)-N(3) | 1.7569(14) |
| N(2)-C(3)  | 1.402(2)   |
| C(2)-C(3)  | 1.336(2)   |
| Si(3)-N(3) | 1.7563(14) |

|                  |            |
|------------------|------------|
| N(1)-Si(1)-N(2)  | 106.63(7)  |
| N(1)-Si(1)-Cl(1) | 112.38(5)  |
| N(2)-Si(1)-Cl(1) | 110.08(5)  |
| C(1)-N(1)-Si(1)  | 125.69(11) |
| N(1)-C(1)-N(3)   | 114.86(12) |
| N(1)-C(1)-C(2)   | 112.13(13) |
| N(3)-C(1)-C(2)   | 112.37(13) |
| C(3)-N(2)-Si(1)  | 119.06(11) |
| C(3)-C(2)-C(1)   | 128.88(15) |
| C(1)-N(3)-Si(3)  | 120.21(11) |
| C(1)-N(3)-Si(2)  | 111.16(10) |
| Si(3)-N(3)-Si(2) | 122.71(7)  |
| C(2)-C(3)-N(2)   | 126.21(16) |

---

Symmetry transformations used to generate equivalent atoms:

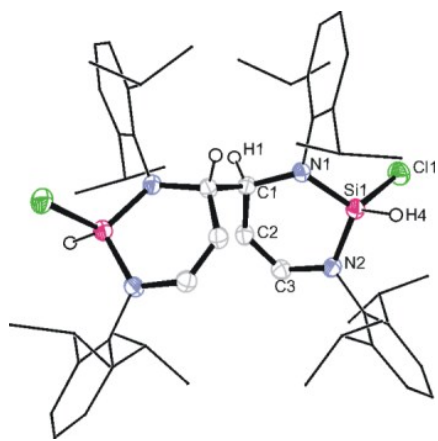

**Figure S3** Molecular structure of compound **3**. Thermal ellipsoids are drawn at 50% probability level. H atoms (except those in C1 and Si1) are omitted for clarity.

**Table S5** Crystal data and structure refinement for **3**



|                                   |                                                                                |          |
|-----------------------------------|--------------------------------------------------------------------------------|----------|
| Empirical formula                 | C <sub>54</sub> H <sub>76</sub> Cl <sub>2</sub> N <sub>4</sub> Si <sub>2</sub> |          |
| Formula weight                    | 908.27                                                                         |          |
| Temperature                       | 150(2) K                                                                       |          |
| Wavelength                        | 1.54184 Å                                                                      |          |
| Crystal system                    | Tetragonal                                                                     |          |
| Space group                       | I41/a                                                                          |          |
| Unit cell dimensions              | a = 20.92430(10) Å                                                             | α = 90°. |
|                                   | b = 20.92430(10) Å                                                             | β = 90°. |
|                                   | c = 23.8905(2) Å                                                               | γ = 90°. |
| Volume                            | 10459.89(11) Å <sup>3</sup>                                                    |          |
| Z                                 | 8                                                                              |          |
| Density (calculated)              | 1.154 Mg/m <sup>3</sup>                                                        |          |
| Absorption coefficient            | 1.837 mm <sup>-1</sup>                                                         |          |
| F(000)                            | 3920                                                                           |          |
| Crystal size                      | 0.45 x 0.21 x 0.17 mm <sup>3</sup>                                             |          |
| Theta range for data collection   | 2.81 to 67.46°.                                                                |          |
| Index ranges                      | -25 ≤ h ≤ 23, -24 ≤ k ≤ 25, -28 ≤ l ≤ 25                                       |          |
| Reflections collected             | 35549                                                                          |          |
| Independent reflections           | 4706 [R(int) = 0.0502]                                                         |          |
| Completeness to theta = 67.46°    | 99.9 %                                                                         |          |
| Absorption correction             | Semi-empirical from equivalents                                                |          |
| Max. and min. transmission        | 1.00000 and 0.69397                                                            |          |
| Refinement method                 | Full-matrix least-squares on F <sup>2</sup>                                    |          |
| Data / restraints / parameters    | 4706 / 0 / 292                                                                 |          |
| Goodness-of-fit on F <sup>2</sup> | 1.029                                                                          |          |
| Final R indices [I > 2σ(I)]       | R1 = 0.0404, wR2 = 0.1075                                                      |          |
| R indices (all data)              | R1 = 0.0460, wR2 = 0.1149                                                      |          |
| Largest diff. peak and hole       | 0.446 and -0.223 e.Å <sup>-3</sup>                                             |          |

**Table S6** Selected interatomic distances [Å] and angles [°] for **3**

|             |            |
|-------------|------------|
| Cl(1)-Si(1) | 2.0703(6)  |
| Si(1)-N(1)  | 1.7014(13) |
| Si(1)-N(2)  | 1.7086(13) |
| N(1)-C(1)   | 1.4842(19) |
| C(1)-C(2)   | 1.505(2)   |
| C(1)-C(1)#1 | 1.570(3)   |

|                  |            |
|------------------|------------|
| N(2)-C(3)        | 1.404(2)   |
| C(2)-C(3)        | 1.333(2)   |
|                  |            |
| N(1)-Si(1)-N(2)  | 106.13(6)  |
| N(1)-Si(1)-Cl(1) | 111.76(5)  |
| N(2)-Si(1)-Cl(1) | 111.51(5)  |
| C(1)-N(1)-Si(1)  | 125.25(10) |
| N(1)-C(1)-C(2)   | 112.38(12) |
| N(1)-C(1)-C(1)#1 | 110.85(15) |
| C(2)-C(1)-C(1)#1 | 112.03(10) |
| C(3)-N(2)-Si(1)  | 118.61(11) |
| C(16)-N(2)-Si(1) | 121.78(10) |
| C(3)-C(2)-C(1)   | 128.32(15) |
| C(2)-C(3)-N(2)   | 125.28(15) |

---

Symmetry transformations used to generate equivalent atoms:

#1 -x+1,-y+1/2,z

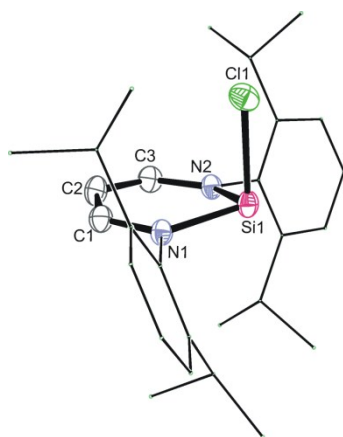

**Figure S 4.** Molecular structure of compound **4**. The whole molecule is disordered over two orientations with refined site occupancies of 0.82 and 0.18, only the major one is depicted. Notably, a twin structure cannot be excluded although the refinement model is satisfied. Thermal ellipsoids are drawn at 50% probability level. H atoms are omitted for clarity.

**Table S7.** Crystal data and structure refinement for **4**.

|                   |                                                      |
|-------------------|------------------------------------------------------|
| Empirical formula | C <sub>27</sub> H <sub>37</sub> Cl N <sub>2</sub> Si |
| Formula weight    | 453.13                                               |
| Temperature       | 150(2) K                                             |
| Wavelength        | 1.54184 Å                                            |

|                                   |                                             |                             |
|-----------------------------------|---------------------------------------------|-----------------------------|
| Crystal system                    | Monoclinic                                  |                             |
| Space group                       | P21                                         |                             |
| Unit cell dimensions              | a = 11.8229(3) Å                            | $\alpha = 90^\circ$ .       |
|                                   | b = 6.68690(10) Å                           | $\beta = 91.272(2)^\circ$ . |
|                                   | c = 16.5376(4) Å                            | $\gamma = 90^\circ$ .       |
| Volume                            | 1307.12(5) Å <sup>3</sup>                   |                             |
| Z                                 | 2                                           |                             |
| Density (calculated)              | 1.151 Mg/m <sup>3</sup>                     |                             |
| Absorption coefficient            | 1.837 mm <sup>-1</sup>                      |                             |
| F(000)                            | 488                                         |                             |
| Crystal size                      | 0.14 x 0.14 x 0.05 mm <sup>3</sup>          |                             |
| Theta range for data collection   | 2.67 to 67.50°.                             |                             |
| Index ranges                      | -14 ≤ h ≤ 14, -7 ≤ k ≤ 7, -14 ≤ l ≤ 19      |                             |
| Reflections collected             | 8272                                        |                             |
| Independent reflections           | 4140 [R(int) = 0.0257]                      |                             |
| Completeness to theta = 67.50°    | 99.5 %                                      |                             |
| Absorption correction             | Semi-empirical from equivalents             |                             |
| Max. and min. transmission        | 1.00000 and 0.73861                         |                             |
| Refinement method                 | Full-matrix least-squares on F <sup>2</sup> |                             |
| Data / restraints / parameters    | 4140 / 100 / 429                            |                             |
| Goodness-of-fit on F <sup>2</sup> | 1.027                                       |                             |
| Final R indices [I > 2σ(I)]       | R1 = 0.0372, wR2 = 0.0904                   |                             |
| R indices (all data)              | R1 = 0.0389, wR2 = 0.0915                   |                             |
| Absolute structure parameter      | 0.472(16)                                   |                             |
| Largest diff. peak and hole       | 0.248 and -0.270 e.Å <sup>-3</sup>          |                             |

**Table S8.** Selected interatomic distances [Å] and angles [°] for compound **4**.

|                  |           |
|------------------|-----------|
| Cl(1)-Si(1)      | 2.1954(9) |
| Si(1)-N(2)       | 1.860(3)  |
| Si(1)-N(1)       | 1.865(2)  |
| N(1)-C(1)        | 1.341(6)  |
| C(1)-C(2)        | 1.370(7)  |
| N(2)-C(3)        | 1.312(4)  |
| C(2)-C(3)        | 1.391(4)  |
| N(2)-Si(1)-N(1)  | 91.57(10) |
| N(2)-Si(1)-Cl(1) | 98.46(8)  |
| N(1)-Si(1)-Cl(1) | 96.22(7)  |

|                 |            |
|-----------------|------------|
| C(1)-N(1)-Si(1) | 126.6(3)   |
| N(1)-C(1)-C(2)  | 124.3(3)   |
| C(3)-N(2)-Si(1) | 127.95(19) |
| C(1)-C(2)-C(3)  | 122.3(3)   |
| N(2)-C(3)-C(2)  | 124.0(3)   |

---

Symmetry transformations used to generate equivalent atoms:

### C. Computational Details

All quantum chemical calculation were performed using the Gaussian 09, Revision D.01 <sup>3</sup> and NBO 6.0 <sup>4</sup> software packages.

Optimization were performed at M05-2X<sup>5</sup>/def2-TZVP <sup>6</sup> level of theory.

Analytical frequencies were computed to verify the optimized geometries as minima.

Si NMR chemical shift were calculated at the HCTH407<sup>7</sup>/6-311+G(3d,p)<sup>8</sup>// M05-2X/def2-TZVP level.

Cartesian coordinates and energies of the optimized geometry of **1** at M05-2X/def2-TZVP level of theory.

Thermochemistry at 298.150 K, 1.00000 Atm.

|                                             |                             |
|---------------------------------------------|-----------------------------|
| Electronic energy                           | -2371.622561 E <sub>h</sub> |
| Sum of electronic and zero-point Energies   | -2371.019222 E <sub>h</sub> |
| Sum of electronic and thermal Energies      | -2370.984226 E <sub>h</sub> |
| Sum of electronic and thermal Enthalpies    | -2370.983282 E <sub>h</sub> |
| Sum of electronic and thermal Free Energies | -2371.085056 E <sub>h</sub> |
| Number of imaginary frequencies             | 0                           |

|    |          |          |          |
|----|----------|----------|----------|
| Cl | 1.44847  | -0.27586 | -2.38583 |
| Si | -0.00465 | -0.35461 | -0.75453 |
| N  | -1.44439 | -0.21246 | 0.60705  |
| Cl | -0.41261 | -2.39545 | -1.00620 |
| N  | 1.23688  | -0.14974 | 0.55312  |
| C  | 1.05602  | -0.56331 | 1.81864  |
| H  | 1.96873  | -0.63035 | 2.39653  |
| C  | -1.34705 | -0.57364 | 1.84848  |
| H  | -2.25338 | -0.59360 | 2.44552  |
| C  | -4.17333 | 1.98173  | -0.57767 |
| H  | -4.35070 | 3.03185  | -0.75524 |
| C  | 2.62696  | 0.15298  | 0.26427  |
| C  | -2.73682 | 0.20456  | 0.13956  |
| C  | -0.11824 | -0.86474 | 2.45203  |
| H  | -0.08732 | -1.17999 | 3.47949  |
| C  | 2.99361  | 1.48137  | 0.03511  |
| C  | -1.90239 | 2.61139  | 0.27477  |
| H  | -0.96889 | 2.10133  | 0.49886  |
| C  | -2.93983 | 1.57163  | -0.09197 |
| C  | 3.55859  | -0.88576 | 0.26110  |
| C  | -3.75507 | -0.73341 | -0.06712 |
| C  | -4.97561 | -0.27071 | -0.55093 |
| H  | -5.77475 | -0.97722 | -0.71871 |
| C  | -3.61323 | -2.20801 | 0.24658  |
| H  | -2.58776 | -2.40392 | 0.54247  |
| C  | 3.17735  | -2.34511 | 0.40464  |
| H  | 2.09944  | -2.42029 | 0.52185  |

|   |          |          |          |
|---|----------|----------|----------|
| C | 4.33861  | 1.76000  | -0.16082 |
| H | 4.65289  | 2.77459  | -0.34469 |
| C | 5.28773  | 0.75145  | -0.13454 |
| H | 6.32983  | 0.98757  | -0.28839 |
| C | -5.18426 | 1.06810  | -0.81773 |
| H | -6.13768 | 1.40241  | -1.19813 |
| C | 4.89658  | -0.55669 | 0.06813  |
| H | 5.63621  | -1.34357 | 0.05964  |
| C | 1.95552  | 2.58245  | 0.00603  |
| H | 1.05902  | 2.17836  | -0.46511 |
| C | 3.83588  | -2.98084 | 1.63035  |
| H | 4.92033  | -2.97772 | 1.53164  |
| H | 3.51154  | -4.01501 | 1.73314  |
| H | 3.58387  | -2.44907 | 2.54667  |
| C | -3.90469 | -3.07418 | -0.97918 |
| H | -4.94860 | -2.99163 | -1.27811 |
| H | -3.70404 | -4.11937 | -0.74894 |
| H | -3.28020 | -2.78104 | -1.81884 |
| C | -4.53102 | -2.60296 | 1.40630  |
| H | -4.32314 | -2.01594 | 2.29967  |
| H | -4.39680 | -3.65640 | 1.64680  |
| H | -5.57601 | -2.44673 | 1.14258  |
| C | -2.34356 | 3.34165  | 1.54618  |
| H | -3.28751 | 3.85842  | 1.37771  |
| H | -1.59822 | 4.07805  | 1.84259  |
| H | -2.48525 | 2.64226  | 2.36879  |
| C | 2.38204  | 3.78608  | -0.82874 |
| H | 3.18883  | 4.33747  | -0.34795 |
| H | 1.54242  | 4.46931  | -0.93836 |
| H | 2.70886  | 3.48013  | -1.82020 |
| C | 3.53985  | -3.12423 | -0.86162 |
| H | 3.07201  | -2.67558 | -1.73394 |
| H | 3.19671  | -4.15386 | -0.77123 |
| H | 4.61842  | -3.13855 | -1.01316 |
| C | -1.63578 | 3.60428  | -0.85349 |
| H | -1.31970 | 3.09381  | -1.76099 |
| H | -0.85110 | 4.29751  | -0.55418 |
| H | -2.52243 | 4.19279  | -1.08219 |
| C | 1.59871  | 3.02759  | 1.42605  |
| H | 1.20468  | 2.20494  | 2.02012  |
| H | 0.85070  | 3.81935  | 1.39736  |
| H | 2.48689  | 3.41414  | 1.92459  |
| H | -0.78921 | 0.66772  | -1.45734 |

Cartesian coordinates and energies of the optimized geometry of **2** at M05-2X/def2-TZVP level of theory.  
Thermochemistry at 298.150 K, 1.00000 Atm.

|                                             |                             |
|---------------------------------------------|-----------------------------|
| Electronic energy                           | -2784.824989 E <sub>h</sub> |
| Sum of electronic and zero-point Energies   | -2783.988735 E <sub>h</sub> |
| Sum of electronic and thermal Energies      | -2783.939813 E <sub>h</sub> |
| Sum of electronic and thermal Enthalpies    | -2783.938869 E <sub>h</sub> |
| Sum of electronic and thermal Free Energies | -2784.067646 E <sub>h</sub> |
| Number of imaginary frequencies             | 0                           |

|    |          |          |          |
|----|----------|----------|----------|
| Cl | 2.60057  | 1.49545  | 1.59413  |
| Si | 1.40824  | -0.08750 | 1.00106  |
| N  | -0.11221 | 0.46920  | 0.45639  |
| C  | -0.84094 | -0.05153 | -0.70878 |
| H  | -1.14647 | 0.84241  | -1.25698 |

|    |          |          |          |
|----|----------|----------|----------|
| Si | -3.50274 | -0.01827 | -1.11666 |
| N  | 2.11239  | -0.91134 | -0.34706 |
| C  | 0.04990  | -0.81600 | -1.64910 |
| H  | -0.41658 | -1.09748 | -2.58094 |
| Si | -2.07276 | -2.46636 | 0.06293  |
| N  | -2.09362 | -0.76816 | -0.38411 |
| C  | 1.33539  | -1.13242 | -1.48246 |
| H  | 1.86327  | -1.64692 | -2.27460 |
| C  | -0.48765 | 2.88544  | 0.29299  |
| C  | -1.04190 | 4.04688  | 0.81368  |
| H  | -0.92153 | 4.97677  | 0.27753  |
| C  | -1.73354 | 4.03812  | 2.01196  |
| H  | -2.14963 | 4.95344  | 2.40542  |
| C  | -1.88195 | 2.85277  | 2.70419  |
| H  | -2.41251 | 2.84964  | 3.64439  |
| C  | -1.36326 | 1.65981  | 2.20948  |
| C  | -1.53830 | 0.39353  | 3.01738  |
| H  | -1.26275 | -0.43961 | 2.37684  |
| C  | -0.61557 | 0.41273  | 4.23883  |
| H  | 0.42229  | 0.57333  | 3.95363  |
| H  | -0.68552 | -0.52757 | 4.78464  |
| H  | -0.90390 | 1.22054  | 4.91144  |
| C  | -2.98593 | 0.18173  | 3.45693  |
| H  | -3.08206 | -0.77791 | 3.96345  |
| H  | -3.65782 | 0.19103  | 2.60087  |
| H  | -3.30873 | 0.95261  | 4.15431  |
| C  | 0.27511  | 2.97731  | -1.01515 |
| H  | 0.69578  | 1.99791  | -1.23511 |
| C  | -0.64181 | 3.38152  | -2.17436 |
| H  | -1.48866 | 2.70843  | -2.28600 |
| H  | -0.08214 | 3.38522  | -3.10876 |
| H  | -1.03577 | 4.38448  | -2.01395 |
| C  | 1.43316  | 3.97288  | -0.92517 |
| H  | 1.06390  | 4.98260  | -0.75338 |
| H  | 1.98478  | 3.97774  | -1.86467 |
| H  | 2.11562  | 3.71484  | -0.12052 |
| C  | 3.51947  | -1.18993 | -0.44891 |
| C  | 4.34409  | -0.29918 | -1.14914 |
| C  | 5.69093  | -0.61683 | -1.28902 |
| H  | 6.33762  | 0.05056  | -1.83813 |
| C  | 6.21689  | -1.76439 | -0.72872 |
| H  | 7.26657  | -1.99031 | -0.84178 |
| C  | 5.39606  | -2.62089 | -0.01753 |
| H  | 5.81488  | -3.51288 | 0.42077  |
| C  | 4.04019  | -2.35630 | 0.13054  |
| C  | 3.14874  | -3.35845 | 0.83106  |
| H  | 2.30991  | -2.82132 | 1.26195  |
| C  | 3.84232  | -4.10236 | 1.96941  |
| H  | 3.10391  | -4.67368 | 2.52907  |
| H  | 4.33499  | -3.41290 | 2.65224  |
| H  | 4.58345  | -4.80804 | 1.59749  |
| C  | 2.59872  | -4.35621 | -0.19176 |
| H  | 2.03025  | -3.85234 | -0.97151 |
| H  | 1.94660  | -5.08061 | 0.29435  |
| H  | 3.42205  | -4.89227 | -0.66359 |
| C  | 3.82701  | 0.98262  | -1.76805 |
| H  | 2.82718  | 1.16618  | -1.38243 |
| C  | 3.73640  | 0.85769  | -3.29069 |
| H  | 4.72388  | 0.67461  | -3.71394 |
| H  | 3.34790  | 1.78067  | -3.72013 |

|   |          |          |          |
|---|----------|----------|----------|
| H | 3.08351  | 0.03995  | -3.58668 |
| C | 4.69937  | 2.18134  | -1.39287 |
| H | 4.80478  | 2.26445  | -0.31382 |
| H | 4.24990  | 3.09802  | -1.76880 |
| H | 5.69228  | 2.09937  | -1.83126 |
| C | -3.46920 | -2.90455 | 1.24032  |
| H | -3.63225 | -2.12360 | 1.97941  |
| H | -3.17225 | -3.80987 | 1.77160  |
| H | -4.41017 | -3.10998 | 0.73981  |
| C | -2.21256 | -3.58462 | -1.44132 |
| H | -3.08073 | -3.33359 | -2.04999 |
| H | -2.31571 | -4.62290 | -1.12457 |
| H | -1.32513 | -3.50737 | -2.06733 |
| C | -0.50159 | -2.92595 | 0.96627  |
| H | 0.38815  | -2.69424 | 0.39034  |
| H | -0.51920 | -4.00628 | 1.11915  |
| H | -0.43278 | -2.45458 | 1.94464  |
| C | -3.25296 | 0.09656  | -2.97928 |
| H | -2.36763 | 0.66645  | -3.25786 |
| H | -4.11446 | 0.57871  | -3.44137 |
| H | -3.15592 | -0.90160 | -3.40679 |
| C | -5.06262 | -1.01827 | -0.84567 |
| H | -5.00326 | -2.03258 | -1.23358 |
| H | -5.85574 | -0.50239 | -1.38900 |
| H | -5.35071 | -1.05996 | 0.20205  |
| C | -3.83810 | 1.69225  | -0.43666 |
| H | -4.06329 | 1.64641  | 0.62767  |
| H | -4.70634 | 2.10612  | -0.95161 |
| H | -3.00995 | 2.38510  | -0.56090 |
| C | -0.66165 | 1.67999  | 0.99824  |
| H | 1.40087  | -0.92736 | 2.20760  |

Cartesian coordinates and energies of the optimized geometry of **4** at M05-2X/def2-TZVP level of theory.  
Thermochemistry at 298.150 K, 1.00000 Atm.

|                                             |                             |
|---------------------------------------------|-----------------------------|
| Electronic energy                           | -1910.764140 E <sub>h</sub> |
| Sum of electronic and zero-point Energies   | -1910.171843 E <sub>h</sub> |
| Sum of electronic and thermal Energies      | -1910.138620 E <sub>h</sub> |
| Sum of electronic and thermal Enthalpies    | -1910.137676 E <sub>h</sub> |
| Sum of electronic and thermal Free Energies | -1910.235681 E <sub>h</sub> |
| Number of imaginary frequencies             | 0                           |

|    |          |          |          |
|----|----------|----------|----------|
| Cl | -0.02861 | -2.37478 | -1.10866 |
| Si | 0.00945  | -0.18913 | -0.82622 |
| N  | -1.34089 | -0.14294 | 0.49149  |
| C  | -1.21863 | -0.59470 | 1.72257  |
| H  | -2.13569 | -0.67515 | 2.29694  |
| C  | 2.66715  | 0.14344  | 0.07103  |
| N  | 1.34334  | -0.20632 | 0.50881  |
| C  | -0.02145 | -0.91920 | 2.34064  |
| H  | -0.03704 | -1.27202 | 3.35601  |
| C  | 1.19725  | -0.63451 | 1.74226  |
| H  | 2.10397  | -0.72925 | 2.33114  |
| C  | -2.66806 | 0.18026  | 0.03906  |
| C  | -2.97073 | 1.52019  | -0.25356 |
| C  | -4.25502 | 1.81837  | -0.68504 |
| H  | -4.51574 | 2.83698  | -0.92224 |
| C  | -5.21586 | 0.82833  | -0.81373 |
| H  | -6.21024 | 1.08292  | -1.14811 |
| C  | -4.89777 | -0.48051 | -0.52005 |

|   |          |          |          |
|---|----------|----------|----------|
| H | -5.64818 | -1.24926 | -0.62929 |
| C | -3.61930 | -0.83670 | -0.09703 |
| C | -3.33159 | -2.29823 | 0.17959  |
| H | -2.28237 | -2.40950 | 0.43546  |
| C | -3.57294 | -3.15074 | -1.06729 |
| H | -4.62617 | -3.15152 | -1.34516 |
| H | -3.27418 | -4.17937 | -0.87186 |
| H | -2.98982 | -2.78020 | -1.90624 |
| C | -4.17378 | -2.81451 | 1.34809  |
| H | -3.99984 | -2.23887 | 2.25596  |
| H | -3.93199 | -3.85680 | 1.54966  |
| H | -5.23616 | -2.75407 | 1.11607  |
| C | -1.94681 | 2.61787  | -0.04728 |
| H | -0.98876 | 2.24534  | -0.40836 |
| C | -1.80475 | 2.95418  | 1.43988  |
| H | -1.04863 | 3.72684  | 1.57918  |
| H | -1.51428 | 2.08546  | 2.02590  |
| H | -2.75172 | 3.32855  | 1.82797  |
| C | -2.25393 | 3.88821  | -0.83321 |
| H | -2.40998 | 3.67624  | -1.88895 |
| H | -1.42004 | 4.58084  | -0.74231 |
| H | -3.13719 | 4.39250  | -0.44363 |
| C | 2.96356  | 1.49614  | -0.13339 |
| C | 4.23520  | 1.82831  | -0.58238 |
| H | 4.48440  | 2.86679  | -0.74319 |
| C | 5.18769  | 0.85268  | -0.81371 |
| H | 6.17154  | 1.12852  | -1.16197 |
| C | 4.87828  | -0.47590 | -0.59214 |
| H | 5.62737  | -1.23336 | -0.76905 |
| C | 3.61639  | -0.86146 | -0.15173 |
| C | 3.33550  | -2.33290 | 0.06934  |
| H | 2.29217  | -2.45171 | 0.34544  |
| C | 3.54959  | -3.13731 | -1.21333 |
| H | 4.59535  | -3.12058 | -1.51782 |
| H | 2.94354  | -2.74044 | -2.02360 |
| H | 3.26209  | -4.17450 | -1.04900 |
| C | 4.20285  | -2.88932 | 1.20048  |
| H | 3.96611  | -3.93819 | 1.37141  |
| H | 4.04689  | -2.34446 | 2.13035  |
| H | 5.25996  | -2.81874 | 0.94756  |
| C | 1.97435  | 2.60244  | 0.16477  |
| H | 1.04598  | 2.14966  | 0.50612  |
| C | 2.48916  | 3.49666  | 1.29469  |
| H | 3.40932  | 3.99973  | 1.00150  |
| H | 2.69336  | 2.91643  | 2.19271  |
| H | 1.74973  | 4.25954  | 1.53475  |
| C | 1.66642  | 3.42931  | -1.08277 |
| H | 0.94644  | 4.21088  | -0.84423 |
| H | 1.25360  | 2.80142  | -1.86963 |
| H | 2.56653  | 3.91081  | -1.46183 |

Cartesian coordinates and energies of the optimized geometry of [4-H]<sup>+</sup> at M05-2X/def2-TZVP level of theory. Thermochemistry at 298.150 K, 1.00000 Atm.

|                                             |                             |
|---------------------------------------------|-----------------------------|
| Electronic energy                           | -1911.180827 E <sub>h</sub> |
| Sum of electronic and zero-point Energies   | -1910.578329 E <sub>h</sub> |
| Sum of electronic and thermal Energies      | -1910.544894 E <sub>h</sub> |
| Sum of electronic and thermal Enthalpies    | -1910.543950 E <sub>h</sub> |
| Sum of electronic and thermal Free Energies | -1910.643821 E <sub>h</sub> |
| Number of imaginary frequencies             | 0                           |



|    |          |          |          |
|----|----------|----------|----------|
| Cl | 0.00032  | -1.79391 | -1.61234 |
| Si | -0.00009 | -0.11332 | -0.48015 |
| N  | -1.34259 | -0.10460 | 0.64761  |
| C  | -1.20887 | -0.33175 | 1.94761  |
| H  | -2.13445 | -0.36765 | 2.50842  |
| N  | 1.34248  | -0.10413 | 0.64754  |
| C  | 0.00001  | -0.48904 | 2.60344  |
| H  | 0.00008  | -0.66994 | 3.66305  |
| C  | 1.20881  | -0.33143 | 1.94753  |
| H  | 2.13442  | -0.36720 | 2.50831  |
| C  | -2.66682 | 0.10749  | 0.08768  |
| C  | -3.48647 | -1.00080 | -0.14771 |
| C  | -4.74079 | -0.75430 | -0.69295 |
| H  | -5.40638 | -1.58230 | -0.88152 |
| C  | -5.14892 | 0.53135  | -0.99829 |
| H  | -6.12658 | 0.69731  | -1.42423 |
| C  | -4.31274 | 1.60583  | -0.75493 |
| H  | -4.64934 | 2.60512  | -0.98403 |
| C  | -3.05148 | 1.42044  | -0.20280 |
| C  | -2.19647 | 2.62697  | 0.12420  |
| H  | -1.20938 | 2.28859  | 0.43719  |
| C  | -2.01131 | 3.54717  | -1.08191 |
| H  | -1.60001 | 3.01179  | -1.93564 |
| H  | -1.33720 | 4.36182  | -0.82533 |
| H  | -2.95718 | 3.98938  | -1.38675 |
| C  | -2.80459 | 3.39419  | 1.30139  |
| H  | -3.79208 | 3.76900  | 1.03854  |
| H  | -2.17721 | 4.24399  | 1.56322  |
| H  | -2.91057 | 2.75714  | 2.17795  |
| C  | -3.08982 | -2.42034 | 0.19912  |
| H  | -2.02800 | -2.44078 | 0.43673  |
| C  | -3.86326 | -2.90304 | 1.42983  |
| H  | -3.69136 | -2.26540 | 2.29562  |
| H  | -3.56672 | -3.91832 | 1.68508  |
| H  | -4.93272 | -2.90248 | 1.22654  |
| C  | -3.31502 | -3.37726 | -0.97240 |
| H  | -4.37610 | -3.51381 | -1.16949 |
| H  | -2.89867 | -4.35363 | -0.73323 |
| H  | -2.84412 | -3.01145 | -1.88143 |
| C  | 2.66675  | 0.10770  | 0.08763  |
| C  | 3.48651  | -1.00069 | -0.14695 |
| C  | 4.74094  | -0.75444 | -0.69205 |
| H  | 5.40662  | -1.58252 | -0.87999 |
| C  | 5.14905  | 0.53104  | -0.99812 |
| H  | 6.12680  | 0.69679  | -1.42396 |
| C  | 4.31275  | 1.60561  | -0.75563 |
| H  | 4.64931  | 2.60477  | -0.98532 |
| C  | 3.05140  | 1.42049  | -0.20360 |
| C  | 2.19629  | 2.62719  | 0.12250  |
| H  | 1.20921  | 2.28897  | 0.43568  |
| C  | 2.01119  | 3.54652  | -1.08428 |
| H  | 2.95707  | 3.98854  | -1.38935 |
| H  | 1.33702  | 4.36132  | -0.82836 |
| H  | 1.60001  | 3.01050  | -1.93767 |
| C  | 2.80429  | 3.39527  | 1.29920  |
| H  | 2.91017  | 2.75885  | 2.17623  |
| H  | 2.17685  | 4.24524  | 1.56035  |
| H  | 3.79180  | 3.76992  | 1.03620  |

|   |          |          |          |
|---|----------|----------|----------|
| C | 3.08984  | -2.42010 | 0.20035  |
| H | 2.02797  | -2.44051 | 0.43777  |
| C | 3.86310  | -2.90239 | 1.43134  |
| H | 4.93260  | -2.90179 | 1.22824  |
| H | 3.56661  | -3.91764 | 1.68681  |
| H | 3.69100  | -2.26454 | 2.29692  |
| C | 3.31529  | -3.37740 | -0.97082 |
| H | 2.84447  | -3.01194 | -1.88003 |
| H | 2.89900  | -4.35372 | -0.73136 |
| H | 4.37641  | -3.51390 | -1.16774 |
| H | -0.00046 | 1.04891  | -1.36389 |

Cartesian coordinates and energies of the optimized geometry of [4-H<sub>2</sub>] at M05-2X/def2-TZVP level of theory. Thermochemistry at 298.150 K, 1.00000 Atm.

|                                             |                             |
|---------------------------------------------|-----------------------------|
| Electronic energy                           | -1911.953579 E <sub>h</sub> |
| Sum of electronic and zero-point Energies   | -1911.343116 E <sub>h</sub> |
| Sum of electronic and thermal Energies      | -1911.309466 E <sub>h</sub> |
| Sum of electronic and thermal Enthalpies    | -1911.308522 E <sub>h</sub> |
| Sum of electronic and thermal Free Energies | -1911.407731 E <sub>h</sub> |
| Number of imaginary frequencies             | 0                           |

|    |          |          |          |
|----|----------|----------|----------|
| Cl | 1.11682  | -1.19154 | -1.93333 |
| Si | -0.34358 | -0.56786 | -0.41003 |
| N  | -1.76373 | 0.01298  | 0.87192  |
| N  | 0.90885  | -0.25579 | 0.88093  |
| C  | 0.67039  | -0.41723 | 2.18968  |
| H  | 1.56316  | -0.46609 | 2.80025  |
| C  | -1.72728 | -0.16442 | 2.15269  |
| H  | -2.64356 | -0.01916 | 2.71839  |
| C  | -4.33755 | 2.12082  | -0.72462 |
| H  | -4.48352 | 3.15062  | -1.01362 |
| C  | 2.31533  | -0.09592 | 0.57370  |
| C  | -2.99781 | 0.40544  | 0.26720  |
| C  | -0.53979 | -0.48056 | 2.83049  |
| H  | -0.55405 | -0.61894 | 3.89657  |
| C  | 2.77134  | 1.15607  | 0.15267  |
| C  | -2.08899 | 2.77477  | 0.20185  |
| H  | -1.17324 | 2.24508  | 0.45358  |
| C  | -3.15102 | 1.74421  | -0.11241 |
| C  | 3.17967  | -1.17943 | 0.74328  |
| C  | -3.99360 | -0.54719 | 0.03222  |
| C  | -5.16605 | -0.12243 | -0.58626 |
| H  | -5.95204 | -0.83878 | -0.77540 |
| C  | -3.85143 | -2.00110 | 0.43138  |
| H  | -2.86502 | -2.14406 | 0.86456  |
| C  | 2.69982  | -2.57156 | 1.10140  |
| H  | 1.61186  | -2.57328 | 1.10080  |
| C  | 4.13459  | 1.31715  | -0.05559 |
| H  | 4.51607  | 2.27081  | -0.38330 |
| C  | 5.01608  | 0.26897  | 0.14758  |
| H  | 6.07340  | 0.41467  | -0.01487 |
| C  | -5.33992 | 1.19527  | -0.96327 |
| H  | -6.25656 | 1.50347  | -1.44298 |
| C  | 4.53835  | -0.96691 | 0.53665  |
| H  | 5.22711  | -1.78849 | 0.66589  |
| C  | 1.81023  | 2.30862  | -0.05219 |
| H  | 0.88686  | 1.90017  | -0.46090 |
| C  | 3.18594  | -2.99133 | 2.49086  |

|   |          |          |          |
|---|----------|----------|----------|
| H | 4.27464  | -3.01283 | 2.51925  |
| H | 2.82245  | -3.98964 | 2.72924  |
| H | 2.84688  | -2.30886 | 3.26793  |
| C | -3.95823 | -2.92301 | -0.78371 |
| H | -4.94459 | -2.85282 | -1.23980 |
| H | -3.80042 | -3.95704 | -0.48131 |
| H | -3.21506 | -2.66527 | -1.53488 |
| C | -4.89180 | -2.38174 | 1.48645  |
| H | -4.81793 | -1.74270 | 2.36489  |
| H | -4.75105 | -3.41567 | 1.79734  |
| H | -5.89993 | -2.28430 | 1.08632  |
| C | -2.50531 | 3.59328  | 1.42619  |
| H | -3.43169 | 4.13018  | 1.22397  |
| H | -1.73451 | 4.32022  | 1.67867  |
| H | -2.67051 | 2.95070  | 2.28984  |
| C | 2.31562  | 3.34316  | -1.05342 |
| H | 3.15092  | 3.91319  | -0.64913 |
| H | 1.51884  | 4.04942  | -1.27899 |
| H | 2.63103  | 2.87204  | -1.98185 |
| C | 3.15486  | -3.59613 | 0.05982  |
| H | 2.85029  | -3.29048 | -0.93694 |
| H | 2.71233  | -4.56639 | 0.28126  |
| H | 4.23735  | -3.71359 | 0.07546  |
| C | -1.78558 | 3.68913  | -0.98194 |
| H | -1.50372 | 3.11168  | -1.86026 |
| H | -0.96384 | 4.35723  | -0.72759 |
| H | -2.64274 | 4.30943  | -1.23826 |
| C | 1.48807  | 2.98643  | 1.28222  |
| H | 1.04303  | 2.29081  | 1.99113  |
| H | 0.79243  | 3.81147  | 1.12985  |
| H | 2.40143  | 3.38586  | 1.72219  |
| H | -0.82790 | 0.52216  | -1.27237 |
| H | -0.95533 | -1.91169 | -0.36904 |

Cartesian coordinates and energies of the optimized geometry of **A** at M05-2X/def2-TZVP level of theory.  
Thermochemistry at 298.150 K, 1.00000 Atm.

|                                             |                             |
|---------------------------------------------|-----------------------------|
| Electronic energy                           | -1444.913086 E <sub>h</sub> |
| Sum of electronic and zero-point Energies   | -1444.553206 E <sub>h</sub> |
| Sum of electronic and thermal Energies      | -1444.531918 E <sub>h</sub> |
| Sum of electronic and thermal Enthalpies    | -1444.530974 E <sub>h</sub> |
| Sum of electronic and thermal Free Energies | -1444.604327 E <sub>h</sub> |
| Number of imaginary frequencies             | 0                           |

|    |          |          |          |
|----|----------|----------|----------|
| C  | 0.40510  | 2.45362  | 0.02812  |
| C  | -0.05802 | -0.04455 | -0.11610 |
| C  | 0.46604  | -2.50971 | -0.48738 |
| N  | 0.72054  | 1.02676  | -0.05530 |
| N  | 0.70383  | -1.06703 | -0.47411 |
| Si | 2.14742  | 0.07615  | -0.86846 |
| C  | 1.65818  | -3.12165 | -1.21685 |
| H  | 1.70217  | -2.76368 | -2.24430 |
| H  | 2.58728  | -2.85661 | -0.71314 |
| H  | 1.56656  | -4.20582 | -1.22613 |
| C  | 0.43307  | -3.02955 | 0.94969  |
| H  | 1.34410  | -2.74146 | 1.46989  |
| H  | -0.42371 | -2.62213 | 1.48299  |
| H  | 0.34998  | -4.11571 | 0.94929  |
| C  | -0.81958 | -2.89292 | -1.21705 |
| H  | -1.70531 | -2.58101 | -0.67039 |

|    |          |          |          |
|----|----------|----------|----------|
| H  | -0.84061 | -2.44582 | -2.20975 |
| H  | -0.85291 | -3.97616 | -1.32530 |
| C  | -0.12333 | 2.96459  | -1.31160 |
| H  | -1.08096 | 2.50461  | -1.54691 |
| H  | -0.26346 | 4.04405  | -1.26971 |
| H  | 0.58613  | 2.73373  | -2.10478 |
| C  | 1.72963  | 3.14094  | 0.34867  |
| H  | 2.12744  | 2.77188  | 1.29175  |
| H  | 2.46179  | 2.94019  | -0.43395 |
| H  | 1.58419  | 4.21734  | 0.41464  |
| C  | -0.59637 | 2.75638  | 1.13971  |
| H  | -1.59302 | 2.39730  | 0.89867  |
| H  | -0.27161 | 2.30322  | 2.07477  |
| H  | -0.64928 | 3.83520  | 1.27826  |
| C  | -1.52677 | -0.08320 | 0.10003  |
| C  | -2.03343 | -0.30842 | 1.37302  |
| C  | -2.39131 | 0.09769  | -0.97212 |
| C  | -3.40427 | -0.35339 | 1.57201  |
| H  | -1.35386 | -0.43607 | 2.20254  |
| C  | -3.76114 | 0.05684  | -0.76895 |
| H  | -1.98924 | 0.25543  | -1.96222 |
| C  | -4.26803 | -0.16979 | 0.50245  |
| H  | -3.79743 | -0.52782 | 2.56185  |
| H  | -4.43209 | 0.19701  | -1.60255 |
| H  | -5.33527 | -0.20323 | 0.65962  |
| Cl | 3.34993  | -0.29272 | 0.89578  |

Cartesian coordinates and energies of the optimized geometry of [A-H]<sup>+</sup> at M05-2X/def2-TZVP level of theory. Thermochemistry at 298.150 K, 1.00000 Atm.

|                                             |                             |
|---------------------------------------------|-----------------------------|
| Electronic energy                           | -1445.316215 E <sub>h</sub> |
| Sum of electronic and zero-point Energies   | -1444.945865 E <sub>h</sub> |
| Sum of electronic and thermal Energies      | -1444.924660 E <sub>h</sub> |
| Sum of electronic and thermal Enthalpies    | -1444.923716 E <sub>h</sub> |
| Sum of electronic and thermal Free Energies | -1444.996476 E <sub>h</sub> |
| Number of imaginary frequencies             | 0                           |

|   |          |          |          |
|---|----------|----------|----------|
| C | 0.25042  | 2.55720  | -0.18673 |
| C | -0.12245 | -0.00065 | -0.12621 |
| C | 0.57210  | -2.49126 | -0.24282 |
| N | 0.61335  | 1.12072  | -0.13020 |
| N | 0.72886  | -1.01799 | -0.31696 |
| C | 1.87374  | -3.05449 | -0.80005 |
| H | 2.01210  | -2.75706 | -1.83911 |
| H | 2.72797  | -2.72085 | -0.20883 |
| H | 1.84998  | -4.14022 | -0.75914 |
| C | 0.39984  | -2.90884 | 1.21294  |
| H | 1.23521  | -2.55849 | 1.81696  |
| H | -0.52843 | -2.51622 | 1.62107  |
| H | 0.36303  | -3.99448 | 1.27356  |
| C | -0.60210 | -2.96776 | -1.08840 |
| H | -1.55457 | -2.66188 | -0.66605 |
| H | -0.52313 | -2.59298 | -2.10738 |
| H | -0.58355 | -4.05497 | -1.12190 |
| C | -0.30837 | 2.88628  | -1.56667 |
| H | -1.23905 | 2.35284  | -1.74502 |
| H | -0.51348 | 3.95278  | -1.62874 |
| H | 0.40732  | 2.63030  | -2.34694 |
| C | 1.55875  | 3.30366  | 0.04337  |
| H | 1.96477  | 3.08225  | 1.02860  |

|    |          |          |          |
|----|----------|----------|----------|
| H  | 2.29840  | 3.04033  | -0.71671 |
| H  | 1.38680  | 4.37430  | -0.02784 |
| C  | -0.75069 | 2.91549  | 0.90353  |
| H  | -1.72758 | 2.47976  | 0.71521  |
| H  | -0.39403 | 2.59004  | 1.87883  |
| H  | -0.86296 | 3.99741  | 0.92364  |
| C  | -1.58130 | -0.08869 | 0.05939  |
| C  | -2.09149 | -0.20947 | 1.34656  |
| C  | -2.42645 | -0.03767 | -1.04287 |
| C  | -3.46264 | -0.28405 | 1.52764  |
| H  | -1.42542 | -0.23497 | 2.19639  |
| C  | -3.79582 | -0.10912 | -0.84972 |
| H  | -2.01902 | 0.04250  | -2.03972 |
| C  | -4.31224 | -0.23222 | 0.43231  |
| H  | -3.86629 | -0.37853 | 2.52354  |
| H  | -4.45855 | -0.07222 | -1.70015 |
| H  | -5.37980 | -0.28783 | 0.57821  |
| Cl | 3.46074  | 0.09898  | 0.95454  |
| Si | 2.05451  | 0.14730  | -0.47619 |
| H  | 2.63115  | 0.29376  | -1.81252 |

Cartesian coordinates and energies of the optimized geometry of [A-H<sub>2</sub>] at M05-2X/def2-TZVP level of theory. Thermochemistry at 298.150 K, 1.00000 Atm.

|                                             |                             |
|---------------------------------------------|-----------------------------|
| Electronic energy                           | -1446.103417 E <sub>h</sub> |
| Sum of electronic and zero-point Energies   | -1445.725280 E <sub>h</sub> |
| Sum of electronic and thermal Energies      | -1445.703828 E <sub>h</sub> |
| Sum of electronic and thermal Enthalpies    | -1445.702883 E <sub>h</sub> |
| Sum of electronic and thermal Free Energies | -1445.776099 E <sub>h</sub> |
| Number of imaginary frequencies             | 0                           |

|   |          |          |          |
|---|----------|----------|----------|
| C | 0.20370  | 2.54376  | -0.14264 |
| C | -0.24288 | -0.00288 | -0.26076 |
| C | 0.28740  | -2.46165 | -0.34449 |
| N | 0.48691  | 1.12690  | -0.44795 |
| N | 0.54981  | -1.02084 | -0.34222 |
| C | 1.46254  | -3.09897 | -1.08515 |
| H | 1.48190  | -2.76991 | -2.12248 |
| H | 2.40251  | -2.82181 | -0.61322 |
| H | 1.36422  | -4.18279 | -1.06308 |
| C | 0.26629  | -2.97617 | 1.09504  |
| H | 1.18062  | -2.68818 | 1.60770  |
| H | -0.58721 | -2.56994 | 1.63373  |
| H | 0.18480  | -4.06253 | 1.09466  |
| C | -1.00621 | -2.85504 | -1.05666 |
| H | -1.89181 | -2.57274 | -0.49479 |
| H | -1.05441 | -2.39937 | -2.04470 |
| H | -1.01511 | -3.93726 | -1.17902 |
| C | 0.78496  | 3.39009  | -1.27591 |
| H | 0.29065  | 3.14304  | -2.21407 |
| H | 0.62085  | 4.44516  | -1.06271 |
| H | 1.85130  | 3.22194  | -1.38782 |
| C | 0.88272  | 2.89708  | 1.18184  |
| H | 0.46572  | 2.29354  | 1.98734  |
| H | 1.95264  | 2.70831  | 1.12884  |
| H | 0.72414  | 3.94894  | 1.41613  |
| C | -1.28097 | 2.87659  | -0.03742 |
| H | -1.81118 | 2.63455  | -0.95462 |

|    |          |          |          |
|----|----------|----------|----------|
| H  | -1.76665 | 2.37295  | 0.79295  |
| H  | -1.36080 | 3.94981  | 0.12765  |
| C  | -1.70659 | -0.06145 | -0.02785 |
| C  | -2.18893 | -0.29917 | 1.25179  |
| C  | -2.58935 | 0.08410  | -1.08953 |
| C  | -3.55535 | -0.38959 | 1.46853  |
| H  | -1.49530 | -0.40177 | 2.07324  |
| C  | -3.95267 | -0.01562 | -0.87197 |
| H  | -2.20339 | 0.26631  | -2.08189 |
| C  | -4.43704 | -0.25183 | 0.40723  |
| H  | -3.93022 | -0.56893 | 2.46458  |
| H  | -4.63808 | 0.08972  | -1.69893 |
| H  | -5.50028 | -0.32773 | 0.57626  |
| Cl | 3.11412  | -0.51239 | 1.02216  |
| Si | 2.09814  | 0.30942  | -0.64582 |
| H  | 2.96089  | 1.52412  | -0.69866 |
| H  | 2.38416  | -0.33103 | -1.94868 |

Cartesian coordinates and energies of the optimized geometry of LiN(SiMe<sub>3</sub>)<sub>2</sub> at M05-2X/def2-TZVP level of theory. Thermochemistry at 298.150 K, 1.00000 Atm.

|                                             |                            |
|---------------------------------------------|----------------------------|
| Electronic energy                           | -880.982509 E <sub>h</sub> |
| Sum of electronic and zero-point Energies   | -880.753686 E <sub>h</sub> |
| Sum of electronic and thermal Energies      | -880.735655 E <sub>h</sub> |
| Sum of electronic and thermal Enthalpies    | -880.734711 E <sub>h</sub> |
| Sum of electronic and thermal Free Energies | -880.799380 E <sub>h</sub> |
| Number of imaginary frequencies             | 0                          |

|    |          |          |          |
|----|----------|----------|----------|
| Si | -0.96187 | 0.14903  | 0.34615  |
| Si | 2.08436  | -0.04562 | -0.01139 |
| C  | 2.47413  | 0.99584  | -1.53413 |
| H  | 2.33870  | 0.41256  | -2.44491 |
| H  | 3.49991  | 1.36461  | -1.51484 |
| H  | 1.80555  | 1.85515  | -1.58771 |
| C  | 2.46117  | 1.02964  | 1.49105  |
| H  | 1.85243  | 1.93488  | 1.47939  |
| H  | 3.50784  | 1.33440  | 1.50435  |
| H  | 2.24804  | 0.49408  | 2.41569  |
| C  | 3.29792  | -1.48799 | -0.00051 |
| H  | 3.15708  | -2.10244 | 0.88879  |
| H  | 4.32973  | -1.13752 | -0.00886 |
| H  | 3.15771  | -2.12001 | -0.87902 |
| C  | -1.23335 | 0.55979  | 2.15967  |
| H  | -1.11737 | -0.33053 | 2.77689  |
| H  | -2.22845 | 0.97158  | 2.32936  |
| H  | -0.50214 | 1.29359  | 2.49653  |
| C  | -1.32843 | 1.69915  | -0.65124 |
| H  | -0.60939 | 2.47991  | -0.40127 |
| H  | -2.32618 | 2.08576  | -0.44355 |
| H  | -1.24563 | 1.50275  | -1.71946 |
| C  | -2.33658 | -1.12346 | -0.10407 |
| H  | -2.34889 | -1.39080 | -1.16718 |
| H  | -3.31513 | -0.69089 | 0.09679  |
| H  | -2.29794 | -2.03759 | 0.50094  |
| N  | 0.48991  | -0.62845 | -0.02149 |
| Li | -0.27638 | -2.16925 | -0.54207 |

Cartesian coordinates and energies of the optimized geometry of HN(SiMe<sub>3</sub>)<sub>2</sub> at M05-2X/def2-TZVP level of theory.  
Thermochemistry at 298.150 K, 1.00000 Atm.

|                                             |                            |
|---------------------------------------------|----------------------------|
| Electronic energy                           | -874.035123 E <sub>h</sub> |
| Sum of electronic and zero-point Energies   | -873.795968 E <sub>h</sub> |
| Sum of electronic and thermal Energies      | -873.779022 E <sub>h</sub> |
| Sum of electronic and thermal Enthalpies    | -873.778078 E <sub>h</sub> |
| Sum of electronic and thermal Free Energies | -873.838962 E <sub>h</sub> |
| Number of imaginary frequencies             | 0                          |

|    |          |          |          |
|----|----------|----------|----------|
| Si | -1.06283 | 0.00318  | 0.33130  |
| Si | 2.07002  | -0.11254 | -0.03844 |
| C  | 2.42238  | 0.83065  | -1.61925 |
| H  | 2.30776  | 0.18044  | -2.48572 |
| H  | 3.43912  | 1.22330  | -1.61963 |
| H  | 1.73596  | 1.66827  | -1.73479 |
| C  | 2.30211  | 1.05066  | 1.41168  |
| H  | 1.60896  | 1.89016  | 1.36875  |
| H  | 3.31276  | 1.45822  | 1.40714  |
| H  | 2.14650  | 0.52940  | 2.35488  |
| C  | 3.26004  | -1.55179 | 0.09028  |
| H  | 3.11661  | -2.09224 | 1.02465  |
| H  | 4.29127  | -1.20294 | 0.05272  |
| H  | 3.11597  | -2.24993 | -0.73414 |
| C  | -1.32054 | 0.23665  | 2.17277  |
| H  | -1.27956 | -0.72047 | 2.69106  |
| H  | -2.29111 | 0.69143  | 2.37121  |
| H  | -0.55302 | 0.88224  | 2.59726  |
| C  | -1.14026 | 1.68433  | -0.49272 |
| H  | -0.35394 | 2.34666  | -0.13210 |
| H  | -2.09607 | 2.16257  | -0.28006 |
| H  | -1.03600 | 1.59074  | -1.57276 |
| C  | -2.41426 | -1.10496 | -0.33972 |
| H  | -2.31505 | -1.23100 | -1.41694 |
| H  | -3.39694 | -0.68170 | -0.13583 |
| H  | -2.37378 | -2.08992 | 0.12519  |
| N  | 0.45824  | -0.75835 | -0.01761 |
| H  | 0.39305  | -1.73408 | -0.26423 |

Cartesian coordinates and energies of the optimized geometry of <sup>t</sup>BuNHC at M05-2X/def2-TZVP level of theory.  
Thermochemistry at 298.150 K, 1.00000 Atm.

|                                             |                            |
|---------------------------------------------|----------------------------|
| Electronic energy                           | -619.456816 E <sub>h</sub> |
| Sum of electronic and zero-point Energies   | -619.101399 E <sub>h</sub> |
| Sum of electronic and thermal Energies      | -619.083865 E <sub>h</sub> |
| Sum of electronic and thermal Enthalpies    | -619.082921 E <sub>h</sub> |
| Sum of electronic and thermal Free Energies | -619.144815 E <sub>h</sub> |
| Number of imaginary frequencies             | 0                          |

|   |          |          |          |
|---|----------|----------|----------|
| N | -1.45870 | 0.02323  | -0.09678 |
| N | 0.66070  | 0.24083  | -0.05813 |
| C | -2.78146 | -0.63689 | -0.04445 |
| C | -0.31379 | -0.69512 | -0.08023 |
| C | 2.93370  | 0.64933  | -0.95789 |
| H | 2.47703  | 0.60830  | -1.94544 |

|   |          |          |          |
|---|----------|----------|----------|
| H | 3.91943  | 0.19219  | -1.01713 |
| H | 3.07075  | 1.68660  | -0.67370 |
| C | -3.35343 | -0.49855 | 1.36543  |
| H | -2.67893 | -0.97069 | 2.07712  |
| H | -4.32299 | -0.99143 | 1.41943  |
| H | -3.48311 | 0.54197  | 1.65152  |
| C | 2.56529  | 0.10941  | 1.47605  |
| H | 2.45886  | 1.15152  | 1.76599  |
| H | 3.61516  | -0.16596 | 1.56626  |
| H | 1.98169  | -0.50122 | 2.16228  |
| C | 2.08752  | -0.13566 | 0.04574  |
| C | -3.73119 | -0.04040 | -1.08430 |
| H | -4.08127 | 0.94989  | -0.81600 |
| H | -4.60353 | -0.68524 | -1.17053 |
| H | -3.24135 | 0.00674  | -2.05549 |
| C | -1.21107 | 1.39591  | -0.05286 |
| C | 0.13767  | 1.53460  | -0.02821 |
| C | -2.22789 | 2.48814  | -0.08665 |
| H | -1.75891 | 3.42573  | 0.19395  |
| H | -3.04482 | 2.31477  | 0.60770  |
| H | -2.65287 | 2.61672  | -1.08067 |
| C | 0.91180  | 2.81062  | -0.02943 |
| H | 1.34109  | 3.02448  | -1.00680 |
| H | 1.71891  | 2.80574  | 0.69719  |
| H | 0.25148  | 3.63305  | 0.22652  |
| C | -2.61803 | -2.12048 | -0.35830 |
| H | -2.19476 | -2.26037 | -1.34989 |
| H | -1.95895 | -2.60297 | 0.35422  |
| H | -3.60428 | -2.58141 | -0.31828 |
| C | 2.24331  | -1.61913 | -0.27193 |
| H | 1.66727  | -2.23124 | 0.41230  |
| H | 1.89996  | -1.83495 | -1.28067 |
| H | 3.30020  | -1.86953 | -0.18899 |

Cartesian coordinates and energies of the optimized geometry of <sup>t</sup>BuNHC-HCl at M05-2X/def2-TZVP level of theory. Thermochemistry at 298.150 K, 1.00000 Atm.

|                                             |                             |
|---------------------------------------------|-----------------------------|
| Electronic energy                           | -1080.321030E <sub>h</sub>  |
| Sum of electronic and zero-point Energies   | -1079.950094 E <sub>h</sub> |
| Sum of electronic and thermal Energies      | -1079.930474 E <sub>h</sub> |
| Sum of electronic and thermal Enthalpies    | -1079.929529 E <sub>h</sub> |
| Sum of electronic and thermal Free Energies | -1079.996265 E <sub>h</sub> |
| Number of imaginary frequencies             | 0                           |

|   |          |          |          |
|---|----------|----------|----------|
| N | -0.88990 | 0.77261  | 0.45836  |
| N | 1.28087  | 0.85486  | 0.32797  |
| C | -2.23519 | 0.20349  | 0.76200  |
| C | 3.28441  | 0.16638  | -0.91734 |
| H | 2.60758  | -0.46296 | -1.49446 |
| H | 4.23780  | -0.34543 | -0.80349 |
| H | 3.47162  | 1.09786  | -1.44162 |
| C | -2.99610 | 1.16889  | 1.66555  |
| H | -2.45967 | 1.31359  | 2.60161  |
| H | -3.97138 | 0.74095  | 1.88892  |
| H | -3.15390 | 2.13853  | 1.20403  |
| C | 3.47633  | 1.42161  | 1.27975  |
| H | 3.51848  | 2.39129  | 0.79427  |
| H | 4.49646  | 1.06306  | 1.40129  |
| H | 3.03322  | 1.54524  | 2.26641  |
| C | 2.69181  | 0.39327  | 0.47115  |



|    |          |          |          |
|----|----------|----------|----------|
| C  | -2.96505 | -0.06924 | -0.55072 |
| H  | -3.25895 | 0.84485  | -1.05608 |
| H  | -3.86996 | -0.63171 | -0.32931 |
| H  | -2.32176 | -0.66594 | -1.19663 |
| C  | -0.57083 | 1.84571  | -0.36210 |
| C  | 0.78612  | 1.89620  | -0.44498 |
| C  | -1.53925 | 2.72454  | -1.07612 |
| H  | -1.07638 | 3.68688  | -1.27124 |
| H  | -2.43914 | 2.90404  | -0.50111 |
| H  | -1.82559 | 2.28826  | -2.03118 |
| C  | 1.59157  | 2.83388  | -1.27582 |
| H  | 1.83560  | 2.38431  | -2.23619 |
| H  | 2.51428  | 3.13372  | -0.79357 |
| H  | 1.01208  | 3.73187  | -1.46551 |
| C  | 0.24413  | 0.18562  | 0.80756  |
| H  | 0.31164  | -0.70403 | 1.38934  |
| Cl | 0.19904  | -1.79540 | -1.25426 |
| C  | -2.05990 | -1.12477 | 1.49081  |
| H  | -1.50488 | -1.82704 | 0.86914  |
| H  | -1.57025 | -0.99331 | 2.45542  |
| H  | -3.05181 | -1.52768 | 1.67926  |
| C  | 2.70537  | -0.93803 | 1.21559  |
| H  | 2.31867  | -0.83691 | 2.22940  |
| H  | 2.14093  | -1.68751 | 0.66131  |
| H  | 3.74079  | -1.26047 | 1.29132  |

Cartesian coordinates and energies of the optimized geometry of :SiH<sub>2</sub> at M05-2X/def2-TZVP level of theory. Thermochemistry at 298.150 K, 1.00000 Atm.

|                                             |                            |
|---------------------------------------------|----------------------------|
| Electronic energy                           | -290.604992 E <sub>h</sub> |
| Sum of electronic and zero-point Energies   | -290.593157 E <sub>h</sub> |
| Sum of electronic and thermal Energies      | -290.590287 E <sub>h</sub> |
| Sum of electronic and thermal Enthalpies    | -290.589343 E <sub>h</sub> |
| Sum of electronic and thermal Free Energies | -290.612883 E <sub>h</sub> |
| Number of imaginary frequencies             | 0                          |

|    |         |          |          |
|----|---------|----------|----------|
| Si | 0.00000 | 0.00000  | 0.13319  |
| H  | 0.00000 | 1.08288  | -0.93230 |
| H  | 0.00000 | -1.08288 | -0.93230 |

Cartesian coordinates and energies of the optimized geometry of [SiH<sub>3</sub>]<sup>+</sup> at M05-2X/def2-TZVP level of theory. Thermochemistry at 298.150 K, 1.00000 Atm.

|                                             |                            |
|---------------------------------------------|----------------------------|
| Electronic energy                           | -290.924037 E <sub>h</sub> |
| Sum of electronic and zero-point Energies   | -290.901804 E <sub>h</sub> |
| Sum of electronic and thermal Energies      | -290.898819 E <sub>h</sub> |
| Sum of electronic and thermal Enthalpies    | -290.897875 E <sub>h</sub> |
| Sum of electronic and thermal Free Energies | -290.922127 E <sub>h</sub> |
| Number of imaginary frequencies             | 0                          |

|    |         |          |          |
|----|---------|----------|----------|
| Si | 0.00000 | 0.00000  | 0.00019  |
| H  | 0.00000 | 1.27059  | 0.73194  |
| H  | 0.00000 | -1.27059 | 0.73194  |
| H  | 0.00000 | 0.00000  | -1.46650 |

Cartesian coordinates and energies of the optimized geometry of LiCl at M05-2X/def2-TZVP level of theory. Thermochemistry at 298.150 K, 1.00000 Atm.

|                                             |                               |
|---------------------------------------------|-------------------------------|
| Electronic energy                           | -467.804062469 E <sub>h</sub> |
| Sum of electronic and zero-point Energies   | -467.802549 E <sub>h</sub>    |
| Sum of electronic and thermal Energies      | -467.800061 E <sub>h</sub>    |
| Sum of electronic and thermal Enthalpies    | -467.799117 E <sub>h</sub>    |
| Sum of electronic and thermal Free Energies | -467.823236 E <sub>h</sub>    |
| Number of imaginary frequencies             | 0                             |

|    |            |            |            |
|----|------------|------------|------------|
| Li | 0.00000000 | 0.00000000 | 0.00000000 |
| Cl | 0.00000000 | 0.00000000 | 2.02306900 |

## D. References

1. D. J. E. Spencer, A. M. Reynolds, P. L. Holland, B. A. Jazdzewski, C. Duboc-Toia, L. L. Pape, S. Yokota, Y. Tachi, S. Itoh, W. B. Tolman, *Inorg. Chem.* 2002, **47**, 6307.
2. G. M. Sheldrick, *SHELX-97 Program for Crystal Structure Determination*, Universität Göttingen (Germany) 1997.
3. M. J. Frisch, G. W. Trucks, H. B. Schlegel, G. E. Scuseria, M. A. Robb, J. R. Cheeseman, G. Scalmani, V. Barone, B. Mennucci, G. A. Petersson, H. Nakatsuji, M. Caricato, X. Li, H. P. Hratchian, A. F. Izmaylov, J. Bloino, G. Zheng, J. L. Sonnenberg, M. Hada, M. Ehara, K. Toyota, R. Fukuda, J. Hasegawa, M. Ishida, T. Nakajima, Y. Honda, O. Kitao, H. Nakai, T. Vreven, J. A. Montgomery, Jr., J. E. Peralta, F. Ogliaro, M. Bearpark, J. J. Heyd, E. Brothers, K. N. Kudin, V. N. Staroverov, T. Keith, R. Kobayashi, J. Normand, K. Raghavachari, A. Rendell, J. C. Burant, S. S. Iyengar, J. Tomasi, M. Cossi, N. Rega, J. M. Millam, M. Klene, J. E. Knox, J. B. Cross, V. Bakken, C. Adamo, J. Jaramillo, R. Gomperts, R. E. Stratmann, O. Yazyev, A. J. Austin, R. Cammi, C. Pomelli, J. W. Ochterski, R. L. Martin, K. Morokuma, V. G. Zakrzewski, G. A. Voth, P. Salvador, J. J. Dannenberg, S. Dapprich, A. D. Daniels, O. Farkas, J. B. Foresman, J. V. Ortiz, J. Cioslowski, and D. J. Fox, Gaussian, Inc., Wallingford CT, 2013.
4. E. D. Glendening, J. K. Badenhoop, A. E. Reed, J. E. Carpenter, J. A. Bohmann, C. M. Morales, C. R. Landis, and F. Weinhold (Theoretical Chemistry Institute, University of Wisconsin, Madison, WI, 2013); <http://nbo6.chem.wisc.edu/>
5. Y. Zhao, N. E. Schultz, D. G. Truhlar, *J. Chem. Theory. Comput.* 2006, **2**, 364.
6. (a) A. Schaefer, H. Horn, and R. Ahlrichs, *J. Chem. Phys.*, 1992, **97**, 2571 ; (b) A. Schaefer, C. Huber, and R. Ahlrichs, *J. Chem. Phys.*, 1994, **100**, 5829; (c) F. Weigend and R. Ahlrichs, *Phys. Chem. Chem. Phys.*, 2005, **7**, 3297; (d) F. Weigend, *Phys. Chem. Chem. Phys.*, 2006, **8**, 1057.
7. (a) F. A. Hamprecht, A. Cohen, D. J. Tozer, and N. C. Handy, *J. Chem. Phys.*, 1998, **109**, 6264 ; (b) A. D. Boese, N. L. Doltsinis, N. C. Handy, and M. Sprik, *J. Chem. Phys.*, 2000, **112**, 1670 ; (c) A. D. Boese and N. C. Handy, *J. Chem. Phys.*, 2001, **114**, 5497.
8. (a) R. Krishnan, J.S. Binkley, R. Seeger and J.A. Pople, *J. Chem. Phys.* 1980, **72**, 650 ; (b) A.D. McLean and G.S. Chandler *J. Chem. Phys.* 1980, **72**, 5639 ; (c) M.J. Frisch, J.A. Pople and J.S. Binkley, *J. Chem. Phys.* 1984, **80**, 3265; (d) T. Clark, J. Chandrasekhar, G.W. Spitznagel, P.V.R. Schleyer, *J. Comp. Chem.* 1983, **4**, 294.
